# Supplementary material
Source: PubMed Central journal article supplement (PMC6753236)
Supplement: NIHMS1048812-supplement-1.pdf [file NIHMS1048812-supplement-1.pdf]

Supplementary Table 1

*Participant Demographics*

| Group     | ASD (28)    | TD (34)     | TD M (19)   | TD F (15)   | ASD M (17)  | ASD F (11)  |
|-----------|-------------|-------------|-------------|-------------|-------------|-------------|
| Age       | 27 (8.39)   | 27 (7.56)   | 26 (7.35)   | 28 (8.03)   | 23 (4.09)   | 33 (9.72)   |
| FSIQ      | 102 (16.23) | 113 (12.56) | 114 (12.63) | 112 (12.81) | 102 (16.77) | 101 (16.01) |
| VIQ       | 104 (18.25) | 111 (14.00) | 112 (13.44) | 110 (14.96) | 106 (16.90) | 101 (20.34) |
| NVIQ      | 100 (15.48) | 114 (11.44) | 115 (11.00) | 113 (12.23) | 99 (17.04)  | 101 (12.51) |
| Ethnicity |             |             |             |             |             |             |
| White     | 21          | 4           | 0           | 4           | 11          | 10          |
| Asian     | 2           | 14          | 11          | 3           | 1           | 1           |
| Hispanic  | 1           | 2           | 1           | 1           | 1           | 0           |
| Black     | 0           | 4           | 2           | 2           | 0           | 0           |
| Unknown   | 4           | 10          | 5           | 5           | 4           | 0           |

Note. Participants are grouped by Autism Spectrum Disorder (ASD) and typically developing (TD) group as well as sex/gender (M = male, F = female). FSIQ = full scale IQ; VIQ = verbal IQ; NVIQ = nonverbal IQ. Group size is presented in parentheses after each group name. Age and IQ scores are presented as mean (standard deviation) for each group. Ethnicity breakdown is presented as number of participants endorsing each ethnicity.

Supplementary Table 2

*Assessment Scores by Diagnosis and Sex/gender Groups*

| Group ( <i>n</i> )          | ASD (28)       | TD (34)         | TD M (19)     | TD F (15)     | ASD M (17)     | ASD F (11)     |
|-----------------------------|----------------|-----------------|---------------|---------------|----------------|----------------|
| AQ Total                    | 31.75 (6.50)   | 17.26 (8.69)**  | 19.32 (9.17)  | 14.67 (7.52)  | 29.35 (5.26)   | 35.45 (6.70)*  |
| RAADS Total                 | 126.61 (36.53) | 50.91 (40.57)** | 58.58 (45.29) | 41.2 (32.58)  | 116.47 (37.01) | 142.27 (31.09) |
| SRS Total                   | 69.29 (8.61)   | 50.76 (9.43)**  | 53.33 (10.78) | 47.67 (6.59)  | 68.47 (8.22)   | 70.55 (9.44)   |
| SPAI Social<br>Phobia Total | 110.76 (37.84) | 67.68 (39.55)** | 73.40 (42.85) | 61.08 (35.92) | 106.71 (35.90) | 115.91 (41.35) |
| AQ Social Skills            | 6.75 (2.50)    | 3.12 (2.66)**   | 3.37 (2.75)   | 2.80 (2.60)   | 6.41 (2.53)    | 7.27 (2.49)    |
| AQ Attention<br>Switching   | 7.36 (1.81)    | 4.65 (2.28)**   | 5.21 (2.12)   | 3.93 (2.34)   | 6.59 (1.50)    | 8.55 (1.63)*   |
| AQ Attention to<br>Detail   | 6.46 (2.43)    | 5.12 (2.32)*    | 5.16 (2.32)   | 5.07 (2.40)   | 6.06 (2.30)    | 7.09 (2.59)    |
| AQ<br>Communication         | 6.57 (2.15)    | 2.47 (2.31)**   | 2.79 (2.62)   | 2.07 (1.87)   | 6.18 (1.88)    | 7.18 (2.48)    |
| AQ Imagination              | 4.61 (1.99)    | 1.91 (1.78)**   | 2.79 (1.84)   | 0.80 (0.86)** | 4.12 (2.06)    | 5.36 (1.69)    |

| Group ( <i>n</i> )           | ASD (28)      | TD (34)         | TD M (19)     | TD F (15)     | ASD M (17)    | ASD F (11)     |
|------------------------------|---------------|-----------------|---------------|---------------|---------------|----------------|
| RAADS Social Relatedness     | 61.11 (20.21) | 25.74 (21.80)** | 30.26 (24.73) | 20.00 (16.46) | 56.12 (21.78) | 68.82 (15.36)  |
| RAADS Circumscribed Interest | 24.71 (9.56)  | 9.12 (6.66)**   | 10.74 (7.09)  | 7.07 (5.64)   | 22.59 (8.08)  | 28.00 (11.09)  |
| RAADS Language               | 10.36 (4.25)  | 4.74 (3.86)**   | 5.42 (4.61)   | 3.87 (2.53)   | 9.88 (4.43)   | 11.09 (4.04)   |
| RAADS Sensory Motor          | 30.25 (12.08) | 10.91 (11.24)** | 12.00 (11.26) | 9.53 (11.44)  | 27.76 (12.10) | 34.09 (11.54)  |
| SRS Awareness                | 63.36 (9.00)  | 49.42 (10.98)** | 51.17 (11.76) | 47.33 (9.96)  | 63.94 (8.91)  | 62.45 (9.51)   |
| SRS Cognition                | 64.14 (10.04) | 49.21 (8.63)**  | 51.89 (9.52)  | 46.00 (6.34)* | 61.00 (8.86)  | 69.00 (10.18)* |
| SRS Communication            | 67.43 (8.83)  | 48.85 (9.38)**  | 52.00 (10.72) | 45.07 (5.79)* | 67.35 (9.09)  | 67.55 (8.84)   |
| SRS Motivation               | 67.43 (10.51) | 55.30 (10.34)** | 56.06 (11.24) | 54.40 (9.45)  | 66.47 (10.79) | 68.91 (10.39)  |
| SRS RRB                      | 73.11 (11.19) | 51.39 (8.84)**  | 53.89 (9.60)  | 48.40 (7.01)  | 72.53 (10.71) | 74.00 (12.37)  |
| SRS SCI                      | 67.64 (8.35)  | 50.67 (9.59)**  | 53.22 (11.05) | 47.60 (6.59)  | 66.59 (7.99)  | 69.27 (9.01)   |

| Group ( <i>n</i> ) | ASD (28)      | TD (34)         | TD M (19)      | TD F (15)      | ASD M (17)    | ASD F (11)    |
|--------------------|---------------|-----------------|----------------|----------------|---------------|---------------|
| BEQ EE             | 72.75 (19.23) | 70.21 (15.53)   | 63.79 (14.94)  | 78.93 (11.95)* | 67.29 (18.08) | 81.18 (18.61) |
| BEQ PE             | 19.50 (5.75)  | 21.48 (4.80)    | 20.68 (4.95)   | 22.57 (4.54)   | 17.94 (5.83)  | 21.91 (4.93)  |
| BEQ NE             | 23.68 (8.43)  | 21.82 (6.06)    | 19.53 (6.12)   | 24.93 (5.93)*  | 23.71 (6.02)  | 23.64 (11.58) |
| BEQ IS             | 29.57 (9.25)  | 26.91 (7.79)    | 23.58 (8.00)   | 31.43 (4.75)*  | 25.65 (9.21)  | 35.64 (5.37)* |
| CAM                | -             | -               | -              | -              | 0.03 (0.20)   | 0.34 (0.24)*  |
| SB-5 WM            | 96.26 (17.54) | 111.06 (12.83)* | 112.65 (12.33) | 109.27 (13.57) | 96.41 (18.76) | 96.00 (16.21) |
| ADOS TOTAL SCORE   | -             | -               | -              | -              | 13.53 (5.50)  | 8.09 (4.57)*  |

Note: Only 15 males had an ADOS module 4 (and therefore camouflaging score). We were unable to obtain one ADOS; the other participant completed a module 3 years ago in a previous research study. AQ = Autism Spectrum Quotient; RAADS = Ritvo Autism Asperger Diagnostic Scale –Revised; SRS = Social Responsiveness Scale-2; SPAI = Social Phobia and Anxiety Inventory; BEQ = Berkeley Expressivity Questionnaire; CAM = Camouflaging score. Scores are presented as mean (standard deviation). \* $p < .05$ , \*\*  $p < .001$ . Comparisons were done between the following groups: ASD vs TD, TD M vs TD F, ASD M vs ASD F.
